# Supplementary material for: Comprehensive Analysis of Expression and Prognostic Value of GATAs in Lung Cancer
Source: PubMed Central journal article supplement (PMC8176258; doi:10.7150/jca.52623), 2021-05-05
Supplement: jcav12p3862s1.pdf [file jcav12p3862s1.pdf]

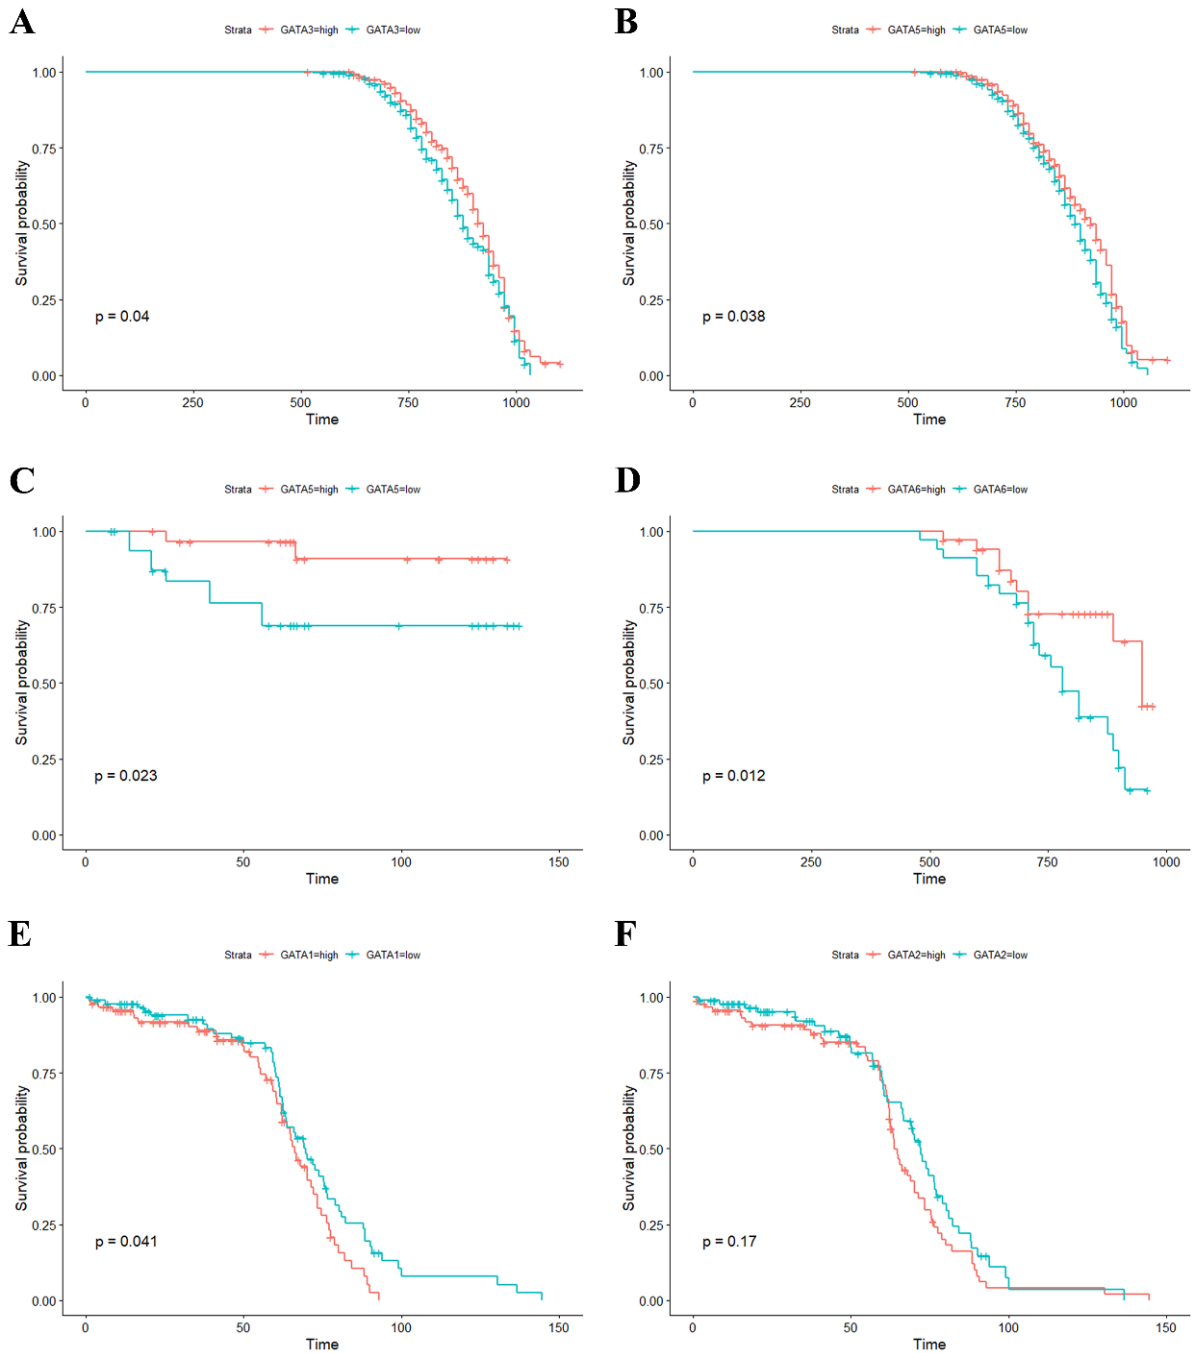

**Supplementary Figure 1. The prognostic value of mRNA level of GATA1-6 in patients with LC (The Gene Expression Omnibus (GEO) database). \* $P < 0.05$ .**
